# Supplementary material
Source: PubMed Central journal article supplement (PMC4509820)

S. Fig. 01

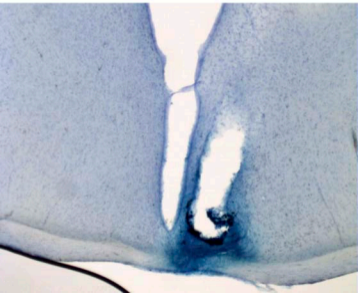

S. Fig. 02

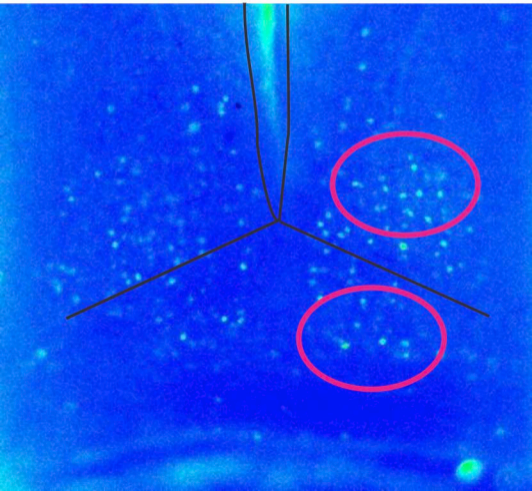

S. Fig. 03

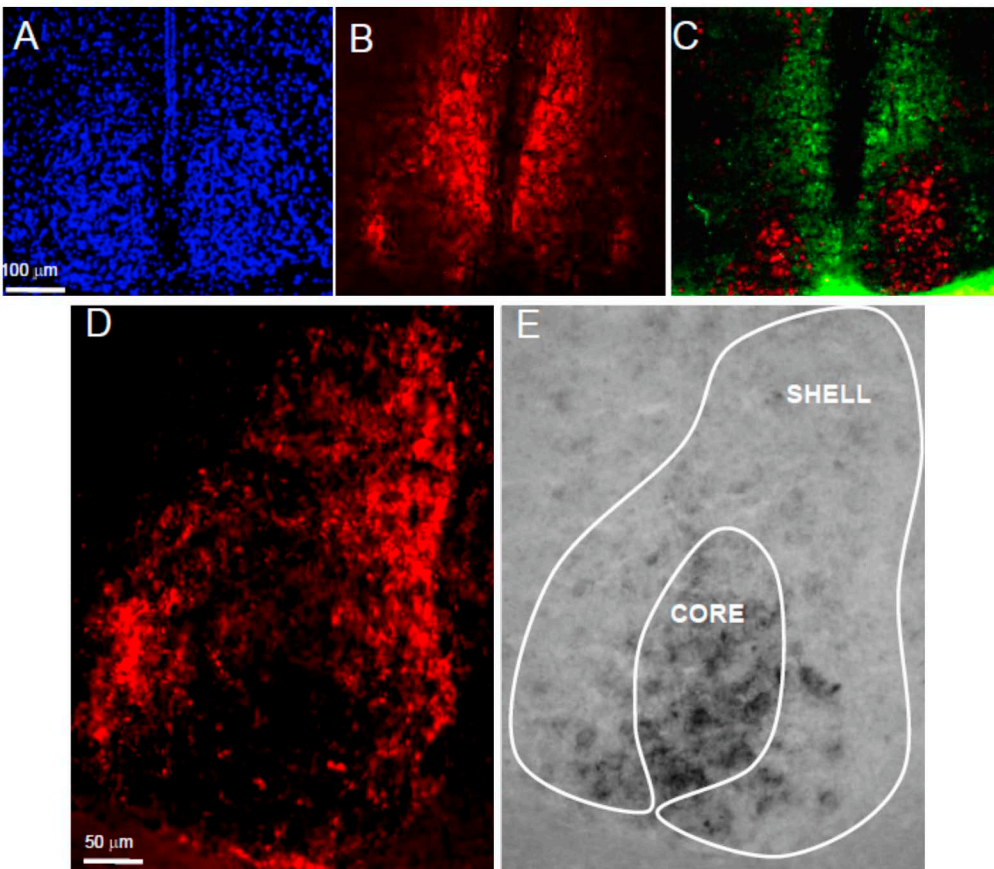

S. Fig. 04

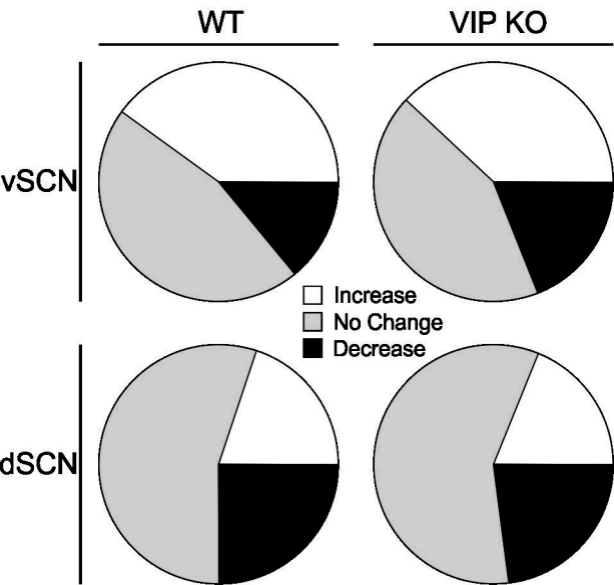

Supplement: NIHMS688488-supplement-Supp_FigureS1-S4.pdf [file NIHMS688488-supplement-Supp_FigureS1-S4.pdf]
